# Supplementary material for: Prediction of High-Risk Pregnancy Based on Machine Learning Algorithms
Source: Research Square preprint supplement (doi:10.21203/rs.3.rs-5869497/v1), 2025-05-02
Supplement: Supplementary file 1 [file 21a7b87c4aba517d688c5f88.xlsx]

## Sheet: Sheet1
Age	SystolicBP	DiastolicBP	BS	BodyTemp	HeartRate	RiskLevel
25	130	80	15	98	86	high risk
35	140	90	13	98	70	high risk
29	90	70	8	100	80	high risk
30	140	85	7	98	70	high risk
35	120	60	6.1	98	76	low risk
23	140	80	7.01	98	70	high risk
23	130	70	7.01	98	78	mid risk
35	85	60	11	102	86	high risk
32	120	90	6.9	98	70	mid risk
42	130	80	18	98	70	high risk
23	90	60	7.01	98	76	low risk
19	120	80	7	98	70	mid risk
25	110	89	7.01	98	77	low risk
20	120	75	7.01	100	70	mid risk
48	120	80	11	98	88	mid risk
15	120	80	7.01	98	70	low risk
50	140	90	15	98	90	high risk
25	140	100	7.01	98	80	high risk
30	120	80	6.9	101	76	mid risk
10	70	50	6.9	98	70	low risk
40	140	100	18	98	90	high risk
50	140	80	6.7	98	70	mid risk
21	90	65	7.5	98	76	low risk
18	90	60	7.5	98	70	low risk
21	120	80	7.5	98	76	low risk
16	100	70	7.2	98	80	low risk
19	120	75	7.2	98	66	low risk
22	100	65	7.2	98	70	low risk
49	120	90	7.2	98	77	low risk
28	90	60	7.2	98	82	low risk
20	100	90	7.1	98	88	low risk
23	100	85	7.1	98	66	low risk
22	120	90	7.1	98	82	low risk
21	120	80	7.1	98	77	low risk
21	75	50	6.1	98	70	low risk
12	95	60	6.1	102	60	low risk
60	120	80	6.1	98	75	low risk
55	100	65	6.1	98	66	low risk
45	120	95	6.1	98	66	low risk
35	100	70	6.1	98	66	low risk
22	120	85	6.1	98	88	low risk
23	120	90	6.1	98	60	low risk
25	90	70	6.1	98	80	low risk
30	120	80	6.1	98	70	low risk
23	120	90	6.1	98	70	low risk
32	120	90	7.5	98	70	low risk
42	120	80	7.5	98	70	low risk
23	90	60	7.5	98	76	low risk
15	76	49	7.5	98	77	low risk
15	120	80	7	98	70	low risk
25	120	80	7	98	66	low risk
22	100	65	7	98	80	low risk
35	100	70	7	98	60	low risk
19	120	85	7	98	60	low risk
60	90	65	7	98	77	low risk
23	120	90	6.7	98	70	low risk
32	120	90	6.4	98	70	low risk
42	120	80	6.4	98	70	low risk
23	90	60	6.4	98	76	low risk
15	76	49	6.4	98	77	low risk
15	120	80	7.2	98	70	low risk
15	80	60	7	98	80	low risk
12	95	60	7.2	98	77	low risk
29	90	70	6.7	98	80	mid risk
31	120	60	6.1	98	76	mid risk
29	130	70	6.7	98	78	mid risk
17	85	60	9	102	86	mid risk
19	120	80	7	98	70	mid risk
20	110	60	7	100	70	mid risk
32	120	65	6	101	76	mid risk
26	85	60	6	101	86	mid risk
29	130	70	7.7	98	78	mid risk
19	120	80	7	98	70	mid risk
54	130	70	12	98	67	mid risk
44	120	90	16	98	80	mid risk
23	130	70	6.9	98	70	mid risk
22	85	60	6.9	98	76	mid risk
55	120	90	12	98	70	mid risk
35	120	80	6.9	98	78	mid risk
21	90	60	6.9	98	86	mid risk
16	90	65	6.9	98	76	mid risk
33	115	65	7	98	70	mid risk
12	95	60	6.9	98	65	mid risk
28	120	90	6.9	98	70	mid risk
21	90	65	6.9	98	76	mid risk
18	90	60	6.9	98	70	mid risk
21	120	80	6.9	98	76	mid risk
16	100	70	6.9	98	80	mid risk
19	120	75	6.9	98	66	mid risk
23	100	85	6.9	98	66	mid risk
22	120	90	7.8	98	82	mid risk
60	120	85	15	98	60	mid risk
13	90	65	7.8	101	80	mid risk
23	120	90	7.8	98	60	mid risk
28	115	60	7.8	101	86	mid risk
50	120	80	7.8	98	70	mid risk
29	130	70	7.8	98	78	mid risk
19	120	80	7	98	70	mid risk
19	120	85	7.8	98	60	mid risk
60	90	65	6.8	98	77	mid risk
55	120	90	6.8	98	66	mid risk
25	120	80	6.8	98	66	mid risk
48	140	90	15	98	90	high risk
25	140	100	6.8	98	80	high risk
23	140	90	6.8	98	70	high risk
34	85	60	11	102	86	high risk
50	140	90	15	98	90	high risk
25	140	100	6.8	98	80	high risk
42	140	100	18	98	90	high risk
32	140	100	7.9	98	78	high risk
50	140	95	17	98	60	high risk
38	135	60	7.9	101	86	high risk
39	90	70	9	98	80	high risk
30	140	100	15	98	70	high risk
63	140	90	15	98	90	high risk
25	140	100	7.9	98	80	high risk
30	120	80	7.9	101	76	high risk
55	140	100	18	98	90	high risk
32	140	100	7.9	98	78	high risk
30	140	100	15	98	70	high risk
48	120	80	11	98	88	high risk
49	140	90	15	98	90	high risk
25	140	100	7.5	98	80	high risk
40	160	100	19	98	77	high risk
32	140	90	18	98	88	high risk
35	140	100	7.5	98	66	high risk
54	140	100	15	98	66	high risk
55	140	95	19	98	77	high risk
29	120	70	9	98	80	high risk
48	120	80	11	98	88	high risk
40	160	100	19	98	77	high risk
32	140	90	18	98	88	high risk
35	140	100	7.5	98	66	high risk
54	140	100	15	98	66	high risk
40	120	95	11	98	80	high risk
22	90	60	7.5	102	60	high risk
40	120	85	15	98	60	high risk
55	140	95	19	98	77	high risk
50	130	100	16	98	75	high risk
18	120	80	6.9	102	76	mid risk
32	140	100	6.9	98	78	high risk
17	90	60	6.9	101	76	mid risk
17	90	63	6.9	101	70	mid risk
25	120	90	6.7	101	80	mid risk
17	120	80	6.7	102	76	mid risk
14	90	65	7	101	70	high risk
15	80	60	6.7	98	80	low risk
15	100	65	6.7	98	76	low risk
12	95	60	6.7	98	77	low risk
37	120	90	11	98	88	high risk
18	100	70	6.7	98	76	low risk
21	100	85	6.7	98	70	low risk
17	110	75	12	101	76	high risk
25	120	90	7.5	98	80	low risk
23	85	65	7.5	98	70	low risk
12	95	60	7.5	98	65	low risk
28	120	90	7.5	98	70	low risk
40	120	90	12	98	80	high risk
55	129	85	7.5	98	88	low risk
25	100	90	7.5	98	76	low risk
35	120	80	7.5	98	80	low risk
21	90	65	7.5	98	76	low risk
18	90	60	7.5	98	70	low risk
21	120	80	7.5	98	76	low risk
16	100	70	7.2	98	80	low risk
19	120	75	7.2	98	66	low risk
40	160	100	19	98	77	high risk
32	140	90	18	98	88	high risk
22	100	65	7.2	98	70	low risk
49	120	90	7.2	98	77	low risk
28	90	60	7.2	98	82	low risk
12	90	60	7.9	102	66	high risk
20	100	90	7.1	98	88	low risk
23	100	85	7.1	98	66	low risk
22	120	90	7.1	98	82	low risk
21	120	80	7.1	98	77	low risk
35	140	100	8	98	66	high risk
54	140	100	15	98	66	high risk
40	120	95	11	98	80	high risk
21	75	50	6.1	98	70	low risk
12	95	60	6.1	102	60	low risk
60	120	85	15	98	60	high risk
55	140	95	19	98	77	high risk
50	130	100	16	98	75	high risk
60	120	80	6.1	98	75	low risk
55	100	65	6.1	98	66	low risk
45	120	95	6.1	98	66	low risk
35	100	70	6.1	98	66	low risk
22	120	85	6.1	98	88	low risk
13	90	65	7.9	101	80	mid risk
23	120	90	6.1	98	60	low risk
17	90	65	6.1	103	67	high risk
28	83	60	8	101	86	high risk
50	120	80	15	98	70	high risk
25	90	70	6.1	98	80	low risk
30	120	80	6.1	98	70	low risk
31	120	60	6.1	98	76	mid risk
23	120	90	6.1	98	70	low risk
29	130	70	6.1	98	78	mid risk
17	85	60	9	102	86	high risk
32	120	90	7.5	98	70	low risk
42	120	80	7.5	98	70	low risk
23	90	60	7.5	98	76	low risk
19	120	80	7	98	70	mid risk
15	76	49	7.5	98	77	low risk
33	120	75	10	98	70	high risk
48	120	80	11	98	88	high risk
15	120	80	7	98	70	low risk
25	120	80	7	98	66	low risk
22	100	65	7	98	80	low risk
50	140	95	17	98	60	high risk
35	100	70	7	98	60	low risk
19	120	85	7	98	60	low risk
60	90	65	7	98	77	low risk
28	85	60	9	101	86	mid risk
50	140	80	6.7	98	70	mid risk
29	90	70	6.7	98	80	mid risk
30	140	100	15	98	70	high risk
31	120	60	6.1	98	76	mid risk
23	120	90	6.7	98	70	low risk
29	130	70	6.7	98	78	mid risk
17	85	60	9	102	86	mid risk
32	120	90	6.4	98	70	low risk
42	120	80	6.4	98	70	low risk
23	90	60	6.4	98	76	low risk
19	120	80	7	98	70	mid risk
15	76	49	6.4	98	77	low risk
29	120	75	7.2	100	70	high risk
48	120	80	11	98	88	high risk
15	120	80	7.2	98	70	low risk
50	140	90	15	98	77	high risk
25	140	100	7.2	98	80	high risk
55	140	80	7.2	101	76	high risk
20	110	60	7	100	70	mid risk
40	140	100	18	98	77	high risk
28	120	80	9	102	76	high risk
32	140	100	8	98	70	high risk
17	90	60	11	101	78	high risk
17	90	63	8	101	70	high risk
25	120	90	12	101	80	high risk
17	120	80	7	102	76	high risk
19	90	65	11	101	70	high risk
15	80	60	7	98	80	low risk
32	120	65	6	101	76	mid risk
12	95	60	7.2	98	77	low risk
37	120	90	11	98	88	high risk
18	100	70	6.8	98	76	low risk
21	100	85	6.9	98	70	low risk
17	110	75	13	101	76	high risk
25	120	90	15	98	80	high risk
10	85	65	6.9	98	70	low risk
12	95	60	6.9	98	65	low risk
28	120	90	6.9	98	70	low risk
40	120	90	6.9	98	80	low risk
55	110	85	6.9	98	88	low risk
25	100	90	6.9	98	76	low risk
35	120	80	6.9	98	80	low risk
21	90	65	6.9	98	76	low risk
18	90	60	6.9	98	70	low risk
21	120	80	6.9	98	76	low risk
16	100	70	6.9	98	80	low risk
19	120	75	6.9	98	66	low risk
40	160	100	19	98	77	high risk
32	140	90	18	98	88	high risk
22	100	65	6.9	98	70	low risk
49	120	90	6.9	98	77	low risk
28	90	60	6.9	98	82	low risk
12	90	60	8	102	66	high risk
20	100	90	7	98	88	low risk
23	100	85	7	98	66	low risk
22	120	90	7	98	82	low risk
21	120	80	7	98	77	low risk
35	140	100	9	98	66	high risk
54	140	100	15	98	66	high risk
40	120	95	11	98	80	high risk
21	75	50	7.7	98	60	low risk
12	90	60	11	102	60	high risk
60	120	85	15	98	60	high risk
55	140	95	19	98	77	high risk
50	130	100	16	98	76	high risk
60	120	80	7.7	98	75	low risk
55	100	65	7.7	98	66	low risk
45	120	95	7.7	98	66	low risk
35	100	70	7.7	98	66	low risk
22	120	85	7.7	98	88	low risk
13	90	65	9	101	80	high risk
23	120	90	7.7	98	60	low risk
17	90	65	7.7	103	67	high risk
26	85	60	6	101	86	mid risk
50	120	80	7.7	98	70	low risk
19	90	70	7.7	98	80	low risk
30	120	80	7.7	98	70	low risk
31	120	60	6.1	98	76	low risk
23	120	80	7.7	98	70	low risk
29	130	70	7.7	98	78	mid risk
17	85	60	6.3	102	86	high risk
32	120	90	7.7	98	70	low risk
42	120	80	7.7	98	70	low risk
23	90	60	7.7	98	76	low risk
19	120	80	7	98	70	mid risk
15	75	49	7.7	98	77	low risk
40	120	75	7.7	98	70	high risk
48	120	80	11	98	88	high risk
15	120	80	7.7	98	70	low risk
25	120	80	7.7	98	66	low risk
22	100	65	6.9	98	80	low risk
12	120	95	6.9	98	60	low risk
35	100	70	6.9	98	60	low risk
19	120	85	6.9	98	60	low risk
60	90	65	6.9	98	77	low risk
55	120	90	6.9	98	76	low risk
35	90	65	6.9	98	75	low risk
51	85	60	6.9	98	66	low risk
62	120	80	6.9	98	66	low risk
25	90	70	6.9	98	66	low risk
21	120	80	6.9	98	88	low risk
22	120	60	15	98	80	high risk
55	120	90	18	98	60	high risk
54	130	70	12	98	67	mid risk
35	85	60	19	98	86	high risk
43	120	90	18	98	70	high risk
12	120	80	6.9	98	80	low risk
65	90	60	6.9	98	70	low risk
60	120	80	6.9	98	76	low risk
25	120	90	6.9	98	70	low risk
22	90	65	6.9	98	78	low risk
66	85	60	6.9	98	86	low risk
56	120	80	13	98	70	high risk
35	90	70	6.9	98	70	low risk
43	120	80	15	98	76	high risk
35	120	60	6.9	98	70	low risk
44	120	90	16	98	80	mid risk
23	130	70	6.9	98	70	mid risk
22	85	60	6.9	98	76	mid risk
55	120	90	12	98	70	mid risk
35	120	80	6.9	98	78	mid risk
21	90	60	6.9	98	86	mid risk
45	120	80	6.9	103	70	low risk
70	85	60	6.9	102	70	low risk
65	120	90	6.9	103	76	low risk
55	120	80	6.9	102	80	low risk
45	90	60	18	101	70	high risk
22	120	80	6.9	103	76	low risk
16	90	65	6.9	98	76	mid risk
12	95	60	6.9	98	77	low risk
37	120	90	11	98	88	high risk
18	100	70	6.9	98	76	low risk
21	100	85	6.9	98	70	low risk
17	110	75	6.9	101	76	high risk
25	120	90	6.9	98	80	low risk
33	115	65	7	98	70	mid risk
12	95	60	6.9	98	65	mid risk
28	120	90	6.9	98	70	mid risk
40	120	90	6.9	98	80	high risk
55	110	85	6.9	98	88	high risk
25	100	90	6.9	98	76	high risk
35	120	80	6.9	98	80	high risk
21	90	65	6.9	98	76	mid risk
18	90	60	6.9	98	70	mid risk
21	120	80	6.9	98	76	mid risk
16	100	70	6.9	98	80	mid risk
19	120	75	6.9	98	66	mid risk
40	160	100	19	98	77	high risk
32	140	90	18	98	88	high risk
23	100	85	6.9	98	66	mid risk
22	120	90	7.8	98	82	mid risk
21	120	80	7.8	98	77	low risk
35	140	100	7.8	98	66	high risk
54	140	100	15	98	66	high risk
40	120	95	11	98	80	high risk
21	75	50	7.8	98	60	low risk
12	90	60	7.8	102	60	high risk
60	120	85	15	98	60	mid risk
55	140	95	19	98	77	high risk
50	130	100	16	98	75	high risk
60	120	80	7.8	98	75	high risk
55	100	65	7.8	98	66	low risk
45	120	95	7.8	98	66	low risk
35	100	70	7.8	98	66	low risk
22	120	85	7.8	98	88	low risk
13	90	65	7.8	101	80	mid risk
23	120	90	7.8	98	60	mid risk
17	90	65	7.8	103	67	high risk
28	115	60	7.8	101	86	mid risk
50	120	80	7.8	98	70	mid risk
19	90	70	7.8	98	80	low risk
30	120	80	7.8	98	70	low risk
31	120	60	6.1	98	76	low risk
23	120	70	7.8	98	70	low risk
29	130	70	7.8	98	78	mid risk
17	85	69	7.8	102	86	high risk
32	120	90	7.8	98	70	low risk
42	120	80	7.8	98	70	low risk
23	90	60	7.8	98	76	low risk
19	120	80	7	98	70	mid risk
15	76	49	7.8	98	77	low risk
20	120	75	7.8	98	70	low risk
48	120	80	11	98	88	high risk
15	120	80	7.8	98	70	low risk
25	120	80	7.8	98	66	low risk
22	100	65	7.8	98	80	low risk
12	120	95	7.8	98	60	low risk
35	100	70	7.8	98	60	low risk
19	120	85	7.8	98	60	mid risk
60	90	65	6.8	98	77	mid risk
55	120	90	6.8	98	66	mid risk
25	120	80	6.8	98	66	mid risk
22	100	65	6.8	98	88	low risk
12	120	95	6.8	98	60	mid risk
35	100	70	6.8	98	60	mid risk
19	120	90	6.8	98	60	mid risk
60	90	65	6.8	98	77	mid risk
55	120	90	6.8	98	78	low risk
50	130	80	16	102	76	mid risk
27	120	90	6.8	102	68	mid risk
60	140	90	12	98	77	high risk
55	100	70	6.8	101	80	mid risk
60	140	80	16	98	66	high risk
12	120	90	6.8	98	80	mid risk
17	140	100	6.8	103	80	high risk
60	120	80	6.8	98	77	mid risk
22	100	65	6.8	98	88	low risk
36	140	100	6.8	102	76	high risk
22	90	60	6.8	98	77	low risk
25	120	100	6.8	98	60	mid risk
35	100	60	15	98	80	high risk
40	140	100	13	101	66	high risk
27	120	70	6.8	98	77	low risk
36	140	100	6.8	102	76	high risk
22	90	60	6.8	98	77	mid risk
25	120	100	6.8	98	60	low risk
35	100	60	15	98	80	high risk
40	140	100	13	101	66	high risk
27	120	70	6.8	98	77	low risk
27	120	70	6.8	98	77	low risk
65	130	80	15	98	86	high risk
35	140	80	13	98	70	high risk
29	90	70	10	98	80	high risk
30	120	80	6.8	98	70	mid risk
35	120	60	6.1	98	76	mid risk
23	140	90	6.8	98	70	high risk
23	130	70	6.8	98	78	mid risk
35	85	60	11	102	86	high risk
32	120	90	6.8	98	70	low risk
43	130	80	18	98	70	mid risk
23	99	60	6.8	98	76	low risk
19	120	80	7	98	70	mid risk
15	76	49	6.8	98	77	low risk
30	120	75	6.8	98	70	mid risk
48	120	80	11	98	88	high risk
15	120	80	6.8	98	70	low risk
48	140	90	15	98	90	high risk
25	140	100	6.8	98	80	high risk
29	100	70	6.8	98	80	low risk
32	120	80	6.8	98	70	mid risk
35	120	60	6.1	98	76	low risk
23	140	90	6.8	98	70	high risk
23	130	70	6.8	98	78	mid risk
34	85	60	11	102	86	high risk
32	120	90	6.8	98	70	low risk
42	130	80	18	98	70	mid risk
23	90	60	6.8	98	76	low risk
19	120	80	7	98	70	mid risk
15	76	49	6.8	98	77	low risk
20	120	75	6.8	98	70	low risk
48	120	80	11	98	88	low risk
15	120	80	6.8	98	70	low risk
50	140	90	15	98	90	high risk
25	140	100	6.8	98	80	high risk
30	120	80	6.8	101	76	low risk
31	110	90	6.8	100	70	mid risk
42	140	100	18	98	90	high risk
18	120	80	6.8	102	76	low risk
32	140	100	7.9	98	78	high risk
17	90	60	7.9	101	76	low risk
19	120	80	7	98	70	mid risk
15	76	49	7.9	98	77	low risk
19	120	75	7.9	98	70	low risk
48	120	80	11	98	88	low risk
15	120	80	7.9	98	70	low risk
25	120	80	7.9	98	66	mid risk
22	100	65	7.9	98	80	low risk
50	140	95	17	98	60	high risk
35	100	70	7.9	98	60	low risk
19	120	85	7.9	98	60	low risk
60	90	65	7.9	98	77	low risk
38	135	60	7.9	101	86	high risk
50	120	80	7.9	98	70	low risk
39	90	70	9	98	80	high risk
30	140	100	15	98	70	high risk
31	120	60	6.1	98	76	mid risk
23	120	90	7.9	98	70	mid risk
29	130	70	7.9	98	78	mid risk
17	85	60	7.9	102	86	low risk
32	120	90	7.9	98	70	low risk
42	120	80	7.9	98	70	low risk
23	90	60	7.9	98	76	low risk
19	120	80	7	98	70	low risk
15	76	49	7.9	98	77	low risk
16	120	75	7.9	98	7	low risk
48	120	80	11	98	88	mid risk
15	120	80	7.9	98	70	low risk
63	140	90	15	98	90	high risk
25	140	100	7.9	98	80	high risk
30	120	80	7.9	101	76	high risk
17	70	50	7.9	98	70	low risk
55	140	100	18	98	90	high risk
18	120	80	7.9	102	76	mid risk
32	140	100	7.9	98	78	high risk
17	90	60	7.5	101	76	low risk
17	90	63	7.5	101	70	low risk
25	120	90	7.5	101	80	low risk
17	120	80	7.5	102	76	low risk
19	90	65	7.5	101	70	low risk
15	80	60	7.5	98	80	low risk
60	90	65	7.5	98	77	low risk
18	85	60	7.5	101	86	mid risk
50	120	80	7.5	98	70	low risk
19	90	70	7.5	98	80	low risk
30	140	100	15	98	70	high risk
31	120	60	6.1	98	76	low risk
23	120	90	7.5	98	70	low risk
29	130	70	7.5	98	78	mid risk
17	85	60	7.5	102	86	low risk
32	120	90	7.5	98	70	low risk
42	120	80	7.5	98	70	low risk
42	90	60	7.5	98	76	low risk
19	120	80	7	98	70	low risk
15	78	49	7.5	98	77	low risk
23	120	75	8	98	70	mid risk
48	120	80	11	98	88	high risk
15	120	80	7.5	98	70	mid risk
49	140	90	15	98	90	high risk
25	140	100	7.5	98	80	high risk
30	120	80	7.5	101	76	mid risk
16	70	50	7.5	100	70	low risk
16	100	70	7.5	98	80	low risk
19	120	75	7.5	98	66	low risk
40	160	100	19	98	77	high risk
32	140	90	18	98	88	high risk
22	100	65	7.5	98	70	low risk
49	120	90	7.5	98	77	low risk
28	90	60	7.5	98	82	low risk
12	90	60	7.5	102	66	low risk
20	100	90	7.5	98	88	low risk
23	100	85	7.5	98	66	low risk
22	120	90	7.5	98	82	low risk
21	120	80	7.5	98	77	low risk
35	140	100	7.5	98	66	high risk
54	140	100	15	98	66	high risk
40	120	95	11	98	80	mid risk
21	75	50	7.5	98	60	low risk
12	90	60	7.5	102	60	low risk
60	120	85	15	98	60	mid risk
55	140	95	19	98	77	high risk
50	130	100	16	98	75	mid risk
60	120	80	7.5	98	75	low risk
55	100	65	7.5	98	66	low risk
45	120	95	7.5	98	66	low risk
35	100	70	7.5	98	66	low risk
22	120	85	7.5	98	88	low risk
13	90	65	7.5	101	80	low risk
23	120	90	7.5	98	60	low risk
17	90	65	7.5	103	67	low risk
28	115	60	7.5	101	86	mid risk
59	120	80	7.5	98	70	low risk
29	120	70	9	98	80	high risk
23	120	80	7.5	98	70	low risk
31	120	60	6.1	98	76	mid risk
23	120	80	7.5	98	70	mid risk
29	130	70	7.5	98	78	mid risk
17	85	60	7.5	102	86	low risk
32	120	90	7.5	98	70	low risk
42	120	80	7.5	98	70	low risk
23	90	60	7.5	98	76	low risk
19	120	80	7	98	70	low risk
15	78	49	7.5	98	77	low risk
20	120	75	7.5	98	70	low risk
48	120	80	11	98	88	high risk
15	120	80	7.5	98	70	low risk
24	120	80	7.5	98	66	low risk
16	100	70	7.5	98	80	low risk
19	120	76	7.5	98	66	low risk
40	160	100	19	98	77	high risk
32	140	90	18	98	88	high risk
22	100	65	7.5	98	70	mid risk
49	120	90	7.5	98	77	mid risk
28	90	60	7.5	98	82	mid risk
12	90	60	7.5	102	66	mid risk
20	100	90	7.5	98	88	mid risk
23	100	85	7.5	98	66	mid risk
22	120	90	7.5	98	82	mid risk
21	120	80	7.5	98	77	mid risk
35	140	100	7.5	98	66	high risk
54	140	100	15	98	66	high risk
40	120	95	11	98	80	high risk
21	75	50	7.5	98	60	low risk
22	90	60	7.5	102	60	high risk
40	120	85	15	98	60	high risk
55	140	95	19	98	77	high risk
50	130	100	16	98	75	high risk
60	120	80	7.5	98	75	mid risk
40	120	85	15	98	60	high risk
55	140	95	19	98	77	high risk
50	130	100	16	98	75	mid risk
41	120	80	7.5	98	75	low risk
55	100	65	7.5	98	66	low risk
45	120	95	7.5	98	66	low risk
35	100	70	7.5	98	66	low risk
22	120	85	7.5	98	88	low risk
13	90	65	7.5	101	80	high risk
23	120	90	7.5	98	60	low risk
17	90	65	7.5	103	67	mid risk
27	135	60	7.5	101	86	high risk
50	120	80	15	98	70	high risk
34	110	70	7	98	80	high risk
32	120	80	7.5	98	70	low risk
31	120	60	6.1	98	76	low risk
23	120	90	7.5	98	70	low risk
29	130	70	7.5	98	78	mid risk
17	85	60	7.5	101	86	high risk
32	120	90	7.5	98	70	low risk
42	120	80	7.5	98	70	low risk
23	90	60	7.5	98	76	low risk
19	120	80	7	98	70	mid risk
15	76	49	7.5	98	77	low risk
20	120	76	7.5	98	70	low risk
48	120	80	11	98	88	high risk
15	120	80	7.5	98	70	low risk
24	120	80	7.5	98	66	low risk
22	100	65	12	98	80	high risk
50	140	95	17	98	60	high risk
35	100	70	11	98	60	high risk
19	120	85	9	98	60	mid risk
30	90	65	8	98	77	mid risk
28	85	60	9	101	86	mid risk
50	130	80	15	98	86	high risk
35	140	90	13	98	70	high risk
29	90	70	11	100	80	high risk
19	120	60	7	98.4	70	low risk
46	140	100	12	99	90	high risk
28	95	60	10	101	86	high risk
50	120	80	7	98	70	mid risk
39	110	70	7.9	98	80	mid risk
25	140	100	15	98.6	70	high risk
31	120	60	6.1	98	76	low risk
23	120	85	8	98	70	low risk
29	130	70	8	98	78	mid risk
17	90	60	9	102	86	mid risk
32	120	90	7	100	70	mid risk
42	120	90	9	98	70	mid risk
23	90	60	6.7	98	76	low risk
19	120	80	7	98	70	low risk
15	76	68	7	98	77	low risk
34	120	75	8	98	70	low risk
48	120	80	11	98	88	high risk
15	120	80	6.6	99	70	low risk
27	140	90	15	98	90	high risk
25	140	100	12	99	80	high risk
36	120	90	7	98	82	mid risk
30	120	80	9	101	76	mid risk
15	70	50	6	98	70	mid risk
40	120	95	7	98	70	high risk
15	90	60	6	98	80	low risk
21	90	50	6.9	98	60	low risk
15	90	49	6	98	77	low risk
21	90	50	6.5	98	60	low risk
15	90	49	6	98	77	low risk
15	90	49	6.7	99	77	low risk
15	90	49	6	99	77	low risk
10	100	50	6	99	70	mid risk
15	100	49	6.8	99	77	low risk
15	100	49	6	99	77	low risk
12	100	50	6.4	98	70	mid risk
15	100	60	6	98	80	low risk
35	140	90	13	98	70	high risk
29	90	70	8	100	80	high risk
30	140	85	7	98	70	high risk
23	140	80	7.01	98	70	high risk
35	85	60	11	102	86	high risk
42	130	80	18	98	70	high risk
50	140	90	15	98	90	high risk
25	140	100	7.01	98	80	high risk
40	140	100	18	98	90	high risk
32	140	100	6.9	98	78	high risk
14	90	65	7	101	70	high risk
37	120	90	11	98	88	high risk
17	110	75	12	101	76	high risk
40	120	90	12	98	80	high risk
40	160	100	19	98	77	high risk
20	120	76	7.5	98	70	low risk
15	120	80	7.5	98	70	low risk
24	120	80	7.5	98	66	low risk
19	120	60	7	98.4	70	low risk
31	120	60	6.1	98	76	low risk
23	120	85	8	98	70	low risk
23	90	60	6.7	98	76	low risk
19	120	80	7	98	70	low risk
15	76	68	7	98	77	low risk
34	120	75	8	98	70	low risk
15	120	80	6.6	99	70	low risk
15	90	60	6	98	80	low risk
21	90	50	6.9	98	60	low risk
15	100	49	7.6	98	77	low risk
12	100	50	6	98	70	mid risk
21	100	50	6.8	98	60	low risk
23	130	70	7.01	98	78	mid risk
32	120	90	6.9	98	70	mid risk
19	120	80	7	98	70	mid risk
20	120	75	7.01	100	70	mid risk
48	120	80	11	98	88	mid risk
30	120	80	6.9	101	76	mid risk
18	120	80	6.9	102	76	mid risk
17	90	60	6.9	101	76	mid risk
17	90	63	6.9	101	70	mid risk
25	120	90	6.7	101	80	mid risk
17	120	80	6.7	102	76	mid risk
13	90	65	7.9	101	80	mid risk
31	120	60	6.1	98	76	mid risk
29	130	70	6.1	98	78	mid risk
19	120	80	7	98	70	mid risk
28	85	60	9	101	86	mid risk
50	140	80	6.7	98	70	mid risk
29	90	70	6.7	98	80	mid risk
31	120	60	6.1	98	76	mid risk
29	130	70	6.7	98	78	mid risk
17	85	60	9	102	86	mid risk
19	120	80	7	98	70	mid risk
20	110	60	7	100	70	mid risk
19	120	80	7	98	70	mid risk
20	120	75	7.01	100	70	mid risk
48	120	80	11	98	88	mid risk
30	120	80	6.9	101	76	mid risk
18	120	80	6.9	102	76	mid risk
17	90	60	6.9	101	76	mid risk
17	90	63	6.9	101	70	mid risk
25	120	90	6.7	101	80	mid risk
17	120	80	6.7	102	76	mid risk
13	90	65	7.9	101	80	mid risk
31	120	60	6.1	98	76	mid risk
29	130	70	6.1	98	78	mid risk
19	120	80	7	98	70	mid risk
28	85	60	9	101	86	mid risk
50	140	80	6.7	98	70	mid risk
29	90	70	6.7	98	80	mid risk
31	120	60	6.1	98	76	mid risk
29	130	70	6.7	98	78	mid risk
17	85	60	9	102	86	mid risk
19	120	80	7	98	70	mid risk
20	110	60	7	100	70	mid risk
32	120	65	6	101	76	mid risk
26	85	60	6	101	86	mid risk
29	130	70	7.7	98	78	mid risk
19	120	80	7	98	70	mid risk
54	130	70	12	98	67	mid risk
44	120	90	16	98	80	mid risk
23	130	70	6.9	98	70	mid risk
22	85	60	6.9	98	76	mid risk
55	120	90	12	98	70	mid risk
35	120	80	6.9	98	78	mid risk
21	90	60	6.9	98	86	mid risk
16	90	65	6.9	98	76	mid risk
33	115	65	7	98	70	mid risk
12	95	60	6.9	98	65	mid risk
28	120	90	6.9	98	70	mid risk
21	90	65	6.9	98	76	mid risk
18	90	60	6.9	98	70	mid risk
21	120	80	6.9	98	76	mid risk
16	100	70	6.9	98	80	mid risk
19	120	75	6.9	98	66	mid risk
23	100	85	6.9	98	66	mid risk
22	120	90	7.8	98	82	mid risk
60	120	85	15	98	60	mid risk
13	90	65	7.8	101	80	mid risk
23	120	90	7.8	98	60	mid risk
28	115	60	7.8	101	86	mid risk
50	120	80	7.8	98	70	mid risk
29	130	70	7.8	98	78	mid risk
19	120	80	7	98	70	mid risk
19	120	85	7.8	98	60	mid risk
60	90	65	6.8	98	77	mid risk
55	120	90	6.8	98	66	mid risk
25	120	80	6.8	98	66	mid risk
12	120	95	6.8	98	60	mid risk
35	100	70	6.8	98	60	mid risk
19	120	90	6.8	98	60	mid risk
60	90	65	6.8	98	77	mid risk
50	130	80	16	102	76	mid risk
27	120	90	6.8	102	68	mid risk
55	100	70	6.8	101	80	mid risk
12	120	90	6.8	98	80	mid risk
60	120	80	6.8	98	77	mid risk
25	120	100	6.8	98	60	mid risk
22	90	60	6.8	98	77	mid risk
30	120	80	6.8	98	70	mid risk
35	120	60	6.1	98	76	mid risk
23	130	70	6.8	98	78	mid risk
43	130	80	18	98	70	mid risk
19	120	80	7	98	70	mid risk
30	120	75	6.8	98	70	mid risk
32	120	80	6.8	98	70	mid risk
23	130	70	6.8	98	78	mid risk
42	130	80	18	98	70	mid risk
19	120	80	7	98	70	mid risk
31	110	90	6.8	100	70	mid risk
19	120	80	7	98	70	mid risk
25	120	80	7.9	98	66	mid risk
31	120	60	6.1	98	76	mid risk
23	120	90	7.9	98	70	mid risk
29	130	70	7.9	98	78	mid risk
48	120	80	11	98	88	mid risk
18	120	80	7.9	102	76	mid risk
18	85	60	7.5	101	86	mid risk
29	130	70	7.5	98	78	mid risk
23	120	75	8	98	70	mid risk
15	120	80	7.5	98	70	mid risk
30	120	80	7.5	101	76	mid risk
40	120	95	11	98	80	mid risk
60	120	85	15	98	60	mid risk
50	130	100	16	98	75	mid risk
28	115	60	7.5	101	86	mid risk
31	120	60	6.1	98	76	mid risk
23	120	80	7.5	98	70	mid risk
29	130	70	7.5	98	78	mid risk
22	100	65	7.5	98	70	mid risk
49	120	90	7.5	98	77	mid risk
28	90	60	7.5	98	82	mid risk
12	90	60	7.5	102	66	mid risk
20	100	90	7.5	98	88	mid risk
23	100	85	7.5	98	66	mid risk
22	120	90	7.5	98	82	mid risk
21	120	80	7.5	98	77	mid risk
60	120	80	7.5	98	75	mid risk
50	130	100	16	98	75	mid risk
17	90	65	7.5	103	67	mid risk
29	130	70	7.5	98	78	mid risk
19	120	80	7	98	70	mid risk
19	120	85	9	98	60	mid risk
30	90	65	8	98	77	mid risk
28	85	60	9	101	86	mid risk
50	120	80	7	98	70	mid risk
39	110	70	7.9	98	80	mid risk
29	130	70	8	98	78	mid risk
17	90	60	9	102	86	mid risk
32	120	90	7	100	70	mid risk
42	120	90	9	98	70	mid risk
36	120	90	7	98	82	mid risk
30	120	80	9	101	76	mid risk
15	70	50	6	98	70	mid risk
10	100	50	6	99	70	mid risk
12	100	50	6.4	98	70	mid risk
12	100	50	6	98	70	mid risk
23	130	70	7.01	98	78	mid risk
32	120	90	6.9	98	70	mid risk
19	120	80	7	98	70	mid risk
20	120	75	7.01	100	70	mid risk
48	120	80	11	98	88	mid risk
30	120	80	6.9	101	76	mid risk
18	120	80	6.9	102	76	mid risk
17	90	60	6.9	101	76	mid risk
17	90	63	6.9	101	70	mid risk
25	120	90	6.7	101	80	mid risk
17	120	80	6.7	102	76	mid risk
13	90	65	7.9	101	80	mid risk
31	120	60	6.1	98	76	mid risk
29	130	70	6.1	98	78	mid risk
19	120	80	7	98	70	mid risk
28	85	60	9	101	86	mid risk
50	140	80	6.7	98	70	mid risk
29	90	70	6.7	98	80	mid risk
31	120	60	6.1	98	76	mid risk
29	130	70	6.7	98	78	mid risk
17	85	60	9	102	86	mid risk
19	120	80	7	98	70	mid risk
20	110	60	7	100	70	mid risk
32	120	65	6	101	76	mid risk
27	120	70	6.8	98	77	low risk
27	120	70	6.8	98	77	low risk
32	120	90	6.8	98	70	low risk
23	99	60	6.8	98	76	low risk
15	76	49	6.8	98	77	low risk
15	120	80	6.8	98	70	low risk
29	100	70	6.8	98	80	low risk
35	120	60	6.1	98	76	low risk
32	120	90	6.8	98	70	low risk
23	90	60	6.8	98	76	low risk
15	76	49	6.8	98	77	low risk
20	120	75	6.8	98	70	low risk
48	120	80	11	98	88	low risk
15	120	80	6.8	98	70	low risk
30	120	80	6.8	101	76	low risk
18	120	80	6.8	102	76	low risk
17	90	60	7.9	101	76	low risk
15	76	49	7.9	98	77	low risk
19	120	75	7.9	98	70	low risk
48	120	80	11	98	88	low risk
15	120	80	7.9	98	70	low risk
22	100	65	7.9	98	80	low risk
35	100	70	7.9	98	60	low risk
19	120	85	7.9	98	60	low risk
60	90	65	7.9	98	77	low risk
50	120	80	7.9	98	70	low risk
17	85	60	7.9	102	86	low risk
32	120	90	7.9	98	70	low risk
42	120	80	7.9	98	70	low risk
23	90	60	7.9	98	76	low risk
19	120	80	7	98	70	low risk
15	76	49	7.9	98	77	low risk
16	120	75	7.9	98	7	low risk
15	120	80	7.9	98	70	low risk
17	70	50	7.9	98	70	low risk
17	90	60	7.5	101	76	low risk
17	90	63	7.5	101	70	low risk
25	120	90	7.5	101	80	low risk
17	120	80	7.5	102	76	low risk
19	90	65	7.5	101	70	low risk
15	80	60	7.5	98	80	low risk
60	90	65	7.5	98	77	low risk
50	120	80	7.5	98	70	low risk
19	90	70	7.5	98	80	low risk
31	120	60	6.1	98	76	low risk
23	120	90	7.5	98	70	low risk
17	85	60	7.5	102	86	low risk
32	120	90	7.5	98	70	low risk
42	120	80	7.5	98	70	low risk
42	90	60	7.5	98	76	low risk
19	120	80	7	98	70	low risk
15	78	49	7.5	98	77	low risk
16	70	50	7.5	100	70	low risk
16	100	70	7.5	98	80	low risk
19	120	75	7.5	98	66	low risk
22	100	65	7.5	98	70	low risk
49	120	90	7.5	98	77	low risk
28	90	60	7.5	98	82	low risk
12	90	60	7.5	102	66	low risk
20	100	90	7.5	98	88	low risk
23	100	85	7.5	98	66	low risk
22	120	90	7.5	98	82	low risk
21	120	80	7.5	98	77	low risk
21	75	50	7.5	98	60	low risk
12	90	60	7.5	102	60	low risk
60	120	80	7.5	98	75	low risk
55	100	65	7.5	98	66	low risk
45	120	95	7.5	98	66	low risk
35	100	70	7.5	98	66	low risk
22	120	85	7.5	98	88	low risk
13	90	65	7.5	101	80	low risk
23	120	90	7.5	98	60	low risk
17	90	65	7.5	103	67	low risk
59	120	80	7.5	98	70	low risk
23	120	80	7.5	98	70	low risk
17	85	60	7.5	102	86	low risk
32	120	90	7.5	98	70	low risk
42	120	80	7.5	98	70	low risk
25	140	100	7.01	98	80	high risk
40	140	100	18	98	90	high risk
32	140	100	6.9	98	78	high risk
14	90	65	7	101	70	high risk
37	120	90	11	98	88	high risk
17	110	75	12	101	76	high risk
40	120	90	12	98	80	high risk
40	160	100	19	98	77	high risk
32	140	90	18	98	88	high risk
12	90	60	7.9	102	66	high risk
35	140	100	8	98	66	high risk
54	140	100	15	98	66	high risk
40	120	95	11	98	80	high risk
60	120	85	15	98	60	high risk
55	140	95	19	98	77	high risk
50	130	100	16	98	75	high risk
17	90	65	6.1	103	67	high risk
28	83	60	8	101	86	high risk
50	120	80	15	98	70	high risk
17	85	60	9	102	86	high risk
33	120	75	10	98	70	high risk
48	120	80	11	98	88	high risk
50	140	95	17	98	60	high risk
30	140	100	15	98	70	high risk
29	120	75	7.2	100	70	high risk
48	120	80	11	98	88	high risk
50	140	90	15	98	77	high risk
25	140	100	7.2	98	80	high risk
55	140	80	7.2	101	76	high risk
40	140	100	18	98	77	high risk
28	120	80	9	102	76	high risk
32	140	100	8	98	70	high risk
17	90	60	11	101	78	high risk
17	90	63	8	101	70	high risk
25	120	90	12	101	80	high risk
17	120	80	7	102	76	high risk
19	90	65	11	101	70	high risk
37	120	90	11	98	88	high risk
17	110	75	13	101	76	high risk
25	120	90	15	98	80	high risk
40	160	100	19	98	77	high risk
32	140	90	18	98	88	high risk
12	90	60	8	102	66	high risk
35	140	100	9	98	66	high risk
54	140	100	15	98	66	high risk
40	120	95	11	98	80	high risk
12	90	60	11	102	60	high risk
60	120	85	15	98	60	high risk
55	140	95	19	98	77	high risk
50	130	100	16	98	76	high risk
13	90	65	9	101	80	high risk
17	90	65	7.7	103	67	high risk
17	85	60	6.3	102	86	high risk
40	120	75	7.7	98	70	high risk
48	120	80	11	98	88	high risk
22	120	60	15	98	80	high risk
55	120	90	18	98	60	high risk
35	85	60	19	98	86	high risk
43	120	90	18	98	70	high risk
32	120	65	6	101	76	mid risk
